# Supplementary material for: Systematic transcriptomic analysis of childhood medulloblastoma identifies N6-methyladenosine-dependent lncRNA signatures associated with molecular subtype, immune cell infiltration, and prognosis
Source: Acta Neuropathol Commun. 2024 Aug 28;12:138. doi: 10.1186/s40478-024-01848-2 (PMC11351195; doi:10.1186/s40478-024-01848-2)
Supplement: Supplementary file 1 — Supplementary Table 1. Patient demographic and clinical information of the discovery and validation cohorts used in this study [file 40478_2024_1848_MOESM1_ESM.xlsx]

## Sheet: Williamson et al.
Variable	Category	Summary
Subgroup	WNT	29
	SHH	61
	Grp3	56
	Grp4	134
Age	0 to <3 years	42
	3 to <16 years	230
	16+ years	8
Sex	Female	95
	Male	185
Overall survival status	0	118
	1	65
Overall survival time	0	0.25-19.78 (mean: 5.787) years
	1	0.18-12.067 (mean: 3.213) years
Progression free survival status	0	106
	1	68
Progression free survival time	0	0.25-19.78 (mean: 5.554) years
	1	0-8.91 (mean: 2.256) years
Metastasis	M0	191
	M+	68

## Sheet: OpenPBTA
Variable	Category	Summary
Subgroup	WNT	9
	SHH	28
	Grp3	14
	Grp4	50
Age	0 to <3 years	17
	3 to <16 years	81
	16+ years	3
Sex	Female	38
	Male	63
Overall survival status	0	73
	1	28
Overall survival time	0	0.057-21.221 (mean: 4.87) years
	1	0.676-10.573 (mean: 3.78) years
Progression free survival status	0	101
	1	0
Progression free survival time	0	0.035-9.399 (mean: 3.539) years
	1	NA
Metastasis	M0	NA
	M+	NA

## Sheet: St. Jude
Variable	Category	Summary
Subgroup	WNT	22
	SHH	37
	Grp3	8
	Grp4	21
Age	0 to <3 years	11
	3 to <16 years	61
	16+ years	16
Sex	Female	24
	Male	64
Overall survival status	0	NA
	1	NA
Overall survival time	0	NA
	1	NA
Progression free survival status	0	NA
	1	NA
Progression free survival time	0	NA
	1	NA
Metastasis	M0	NA
	M+	NA

## Sheet: GSE85217
Variable	Category	Summary
Subgroup	WNT	61
	SHH	207
	Grp3	125
	Grp4	297
Age	0 to <3 years	90
	3 to <16 years	486
	16+ years	114
Sex	Female	239
	Male	451
Overall survival status	0	437
	1	159
Overall survival time	0	0.013-25 (mean: 5.643) years
	1	0.019-22 (mean: 3.339) years
Progression free survival status	0	NA
	1	NA
Progression free survival time	0	NA
	1	NA
Metastasis	M0	369
	M+	168

## Sheet: GSE164677 
Variable	Category	Summary
Subgroup	WNT	8
	SHH	19
	Grp3	16
	Grp4	16
Age	0 to <3 years	15
	3 to <16 years	12
	16+ years	11
Sex	Female	21
	Male	38
Overall survival status	0	19
	1	16
Overall survival time	0	0.083-4.916 (mean: 2.592) years
	1	0.0833-1.333 (mean: 0.426) years
Progression free survival status	0	NA
	1	NA
Progression free survival time	0	NA
	1	NA
Metastasis	M0	10
	M+	7

## Sheet: GSE181293
Variable	Category	Summary
Subgroup	WNT	4
	SHH	4
	Grp3	4
	Grp4	5
Age	0 to <3 years	NA
	3 to <16 years	NA
	16+ years	NA
Sex	Female	NA
	Male	NA
Overall survival status	0	NA
	1	NA
Overall survival time	0	NA
	1	NA
Progression free survival status	0	NA
	1	NA
Progression free survival time	0	NA
	1	NA
Metastasis	M0	NA
	M+	NA
