# Supplementary material for: Systematic transcriptomic analysis of childhood medulloblastoma identifies N6-methyladenosine-dependent lncRNA signatures associated with molecular subtype, immune cell infiltration, and prognosis
Source: Acta Neuropathol Commun. 2024 Aug 28;12:138. doi: 10.1186/s40478-024-01848-2 (PMC11351195; doi:10.1186/s40478-024-01848-2)
Supplement: Supplementary file 2 — Supplementary Table 2. Primer sequences used for qRT-PCR validation of five lncRNA signature genes in D425 cell lines with and without METTL3 and METTL14 knockdown [file 40478_2024_1848_MOESM2_ESM.xlsx]

## Sheet: Sheet1
Name	Sequence
MATN1-AS1_FP	GAGAACAGTGTGTCCGGTAT
MATN1-AS1_RP	GCATGAAACACTAACGGCTT
LINC02145_FP	TTCTCTCCCAATGCAAGTGT
LINC02145_RP	TGTTTTGTCACAGTAGCCCT
LINC01963_FP	GTGTGTGATGGTAAATGGGC
LINC01963_RP	AGAGGGTTTGAGTCTGTGTG
GAS5_FP	CACTGTGTGGAGCAAGTTTT
GAS5_RP	CCCAGAAGTTTGAGGCTGTA
RAET1E-AS1_FP	TCTGCTCACAAGACATCCTG
RAET1E-AS1_RP	CAAGACGTCTAGAGGCAAGG
