# Supplementary material for: Systematic transcriptomic analysis of childhood medulloblastoma identifies N6-methyladenosine-dependent lncRNA signatures associated with molecular subtype, immune cell infiltration, and prognosis
Source: Acta Neuropathol Commun. 2024 Aug 28;12:138. doi: 10.1186/s40478-024-01848-2 (PMC11351195; doi:10.1186/s40478-024-01848-2)
Supplement: Supplementary file 3 — Supplementary Table 3. (A) WGCNA module numbers and colors containing at least one m6A regulator gene. (B) List of co-expressing lncRNA genes within the modules representing at least one m6A regulator gene [file 40478_2024_1848_MOESM3_ESM.xlsx]

## Sheet: 2A
	module	class	modColor
CBLL1	1	WRITER	turquoise
METTL16	1	WRITER	turquoise
FTO	1	ERASER	turquoise
RBM15	1	WRITER	turquoise
ZC3H13	2	WRITER	blue
YTHDF1	2	READER	blue
VIRMA	2	WRITER	blue
ZCCHC4	2	WRITER	blue
YTHDF3	2	READER	blue
METTL5	3	WRITER	brown
FMR1	5	READER	green
IGF2BP3	6	READER	red
METTL14	7	WRITER	black
TRMT112	7	WRITER	black
YTHDF2	7	READER	black
WTAP	10	WRITER	purple
IGF2BP2	11	READER	greenyellow
METTL3	12	WRITER	tan
YTHDC2	14	READER	cyan
ALKBH5	14	ERASER	cyan

## Sheet: 2B
ID	gene_symbol
ENSG00000125804	FAM182A
ENSG00000152931	PART1
ENSG00000162913	OBSCN-AS1
ENSG00000164385	LINC01600
ENSG00000166770	ZNF667-AS1
ENSG00000175147	TMEM51-AS1
ENSG00000176124	DLEU1
ENSG00000176728	TTTY14
ENSG00000177234	LINC01561
ENSG00000177410	ZFAS1
ENSG00000177640	CASC2
ENSG00000179935	LINC00652
ENSG00000180769	WDFY3-AS2
ENSG00000181798	LINC00471
ENSG00000182165	TP53TG1
ENSG00000182873	PRKCZ-AS1
ENSG00000183250	LINC01547
ENSG00000185433	LINC00158
ENSG00000186056	MATN1-AS1
ENSG00000186594	MIR22HG
ENSG00000186615	KTN1-AS1
ENSG00000188242	PP7080
ENSG00000189223	PAX8-AS1
ENSG00000189419	SPATA41
ENSG00000196366	C9orf163
ENSG00000196668	LINC00173
ENSG00000196756	SNHG17
ENSG00000196951	SCOC-AS1
ENSG00000197182	MIRLET7BHG
ENSG00000197568	HHLA3
ENSG00000197989	SNHG12
ENSG00000198496	NBR2
ENSG00000203875	SNHG5
ENSG00000203993	ARRDC1-AS1
ENSG00000205837	LINC00487
ENSG00000205885	C1RL-AS1
ENSG00000206573	THUMPD3-AS1
ENSG00000212766	EWSAT1
ENSG00000213057	C1orf220
ENSG00000214548	MEG3
ENSG00000214900	LINC01588
ENSG00000215417	MIR17HG
ENSG00000218510	LINC00339
ENSG00000224897	POT1-AS1
ENSG00000225206	MIR137HG
ENSG00000225470	JPX
ENSG00000228775	WEE2-AS1
ENSG00000228794	LINC01128
ENSG00000230366	DSCR9
ENSG00000231607	DLEU2
ENSG00000231690	LINC00574
ENSG00000232973	CYP1B1-AS1
ENSG00000233237	LINC00472
ENSG00000234608	MAPKAPK5-AS1
ENSG00000234741	GAS5
ENSG00000235706	DICER1-AS1
ENSG00000250486	FAM218A
ENSG00000250490	LINC02145
ENSG00000251562	MALAT1
ENSG00000255717	SNHG1
ENSG00000256040	PAPPA-AS1
ENSG00000256073	URB1-AS1
ENSG00000256124	LINC01152
ENSG00000256628	ZBTB11-AS1
ENSG00000258701	LINC00638
ENSG00000260339	HEXA-AS1
ENSG00000260630	SNAI3-AS1
ENSG00000260804	LINC01963
ENSG00000260852	FBXL19-AS1
ENSG00000263327	TAPT1-AS1
ENSG00000267080	ASB16-AS1
ENSG00000268592	RAET1E-AS1
ENSG00000279873	LINC01126
ENSG00000279943	FLJ38576
